# Supplementary material for: Extending coprime sensor arrays to achieve the peak side lobe height of a full uniform linear array
Source: Springer Nature journal article supplement (doi:10.1186/1687-6180-2014-148), 2014-09-27
Supplement: 13634_2014_706_MOESM2_ESM.pdf [file 13634_2014_706_MOESM2_ESM.pdf]

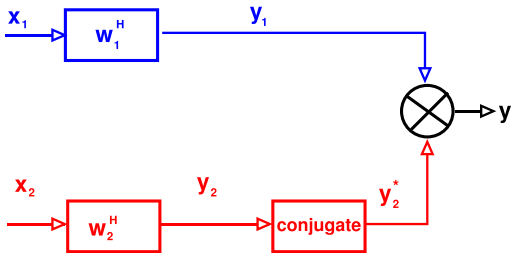

Subarray 1:

$x_1$  : input

$w_1^H$  : array weights

$y_1$  : output

Subarray 2:

$x_2$  : input

$w_2^H$  : array weights

$y_2$  : output

$y$  : CSA output
