# Supplementary material for: Extending coprime sensor arrays to achieve the peak side lobe height of a full uniform linear array
Source: Springer Nature journal article supplement (doi:10.1186/1687-6180-2014-148), 2014-09-27

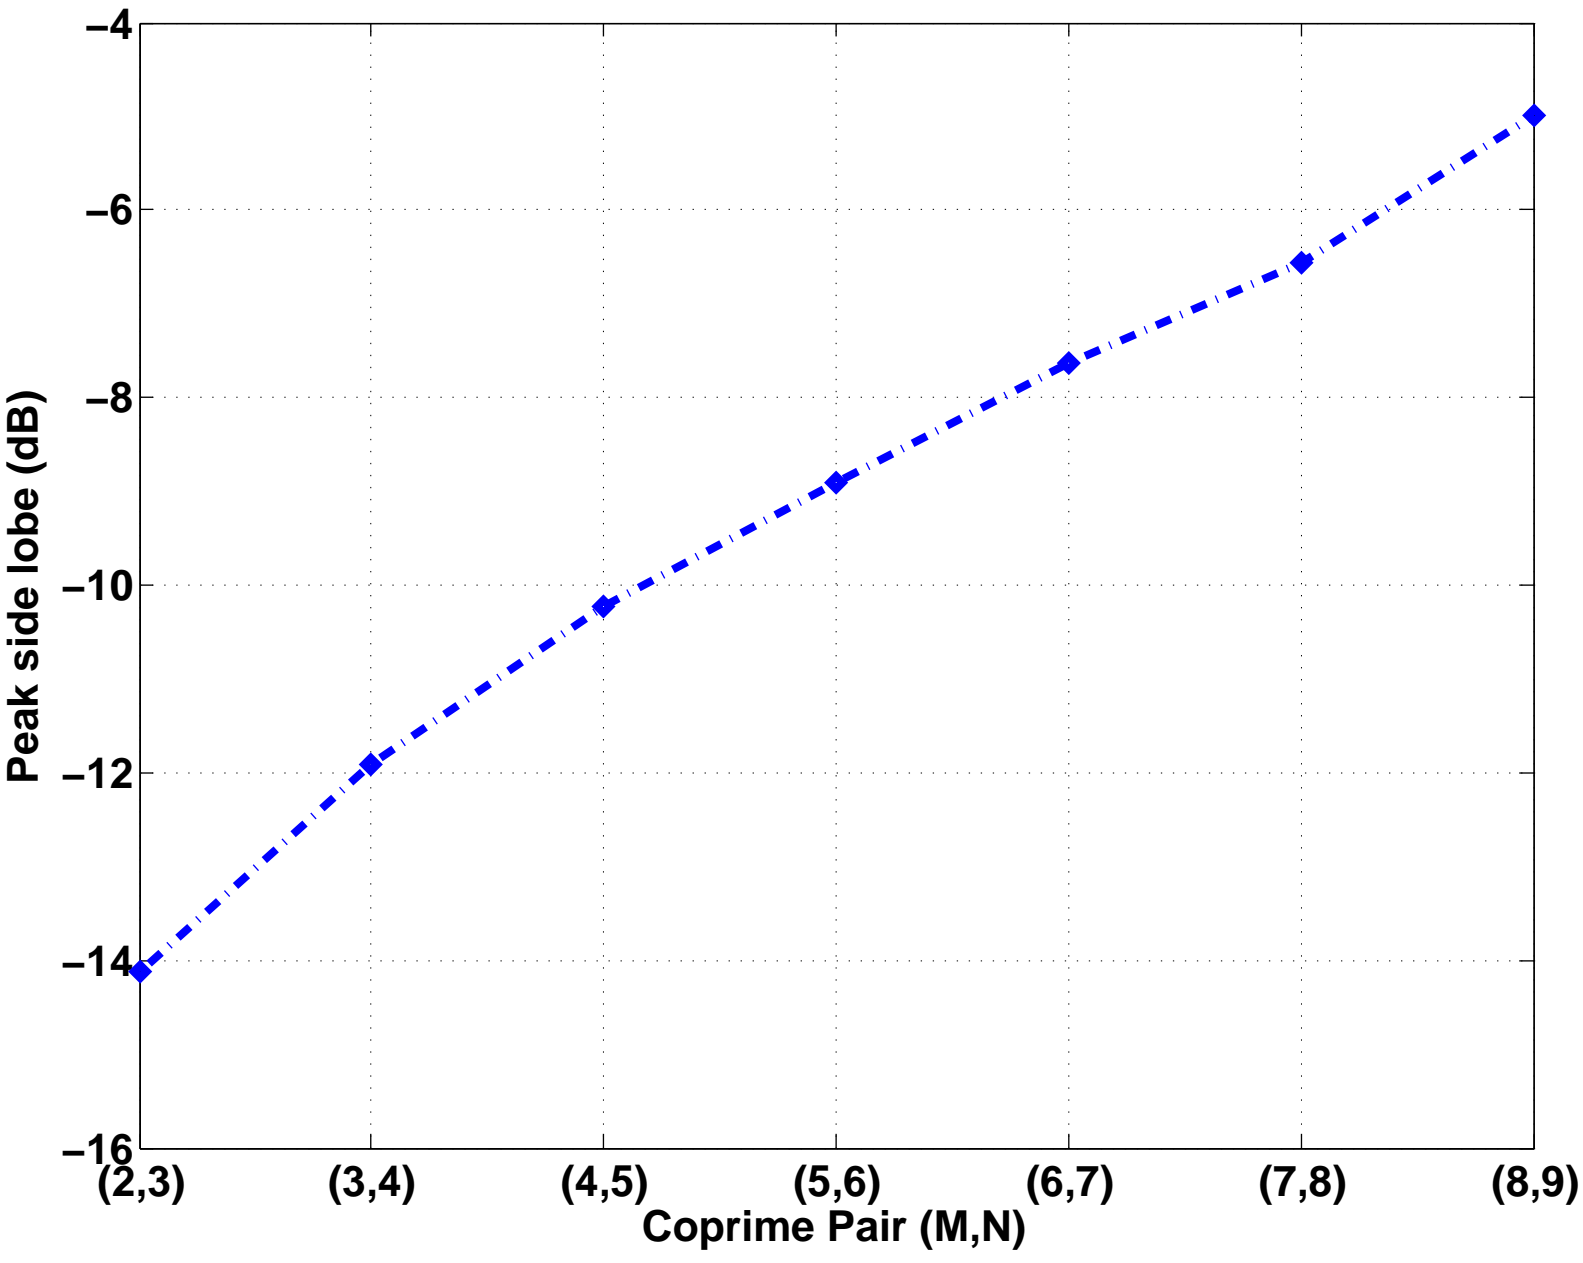

Supplement: 13634_2014_706_MOESM12_ESM.pdf [file 13634_2014_706_MOESM12_ESM.pdf]
